# Supplementary material for: Impact of HepG2 Cells Glutathione Depletion on Neutral Sphingomyelinases mRNA Levels and Activity
Source: MDPI journal article supplement (doi:10.3390/cimb45060318), 2023-06-08
Supplement: s1 [file s1]

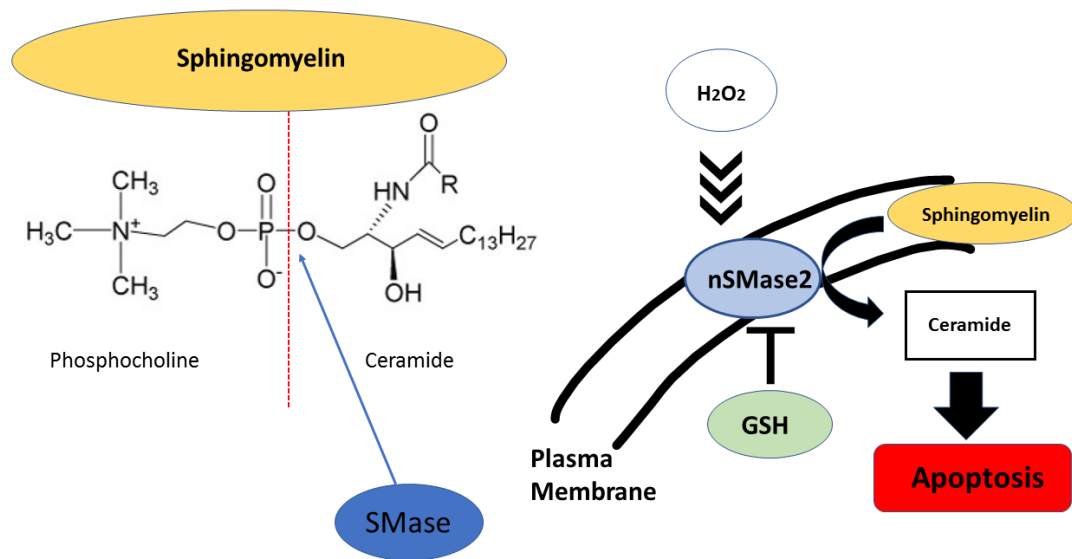

**Supplementary Figure S1.** Surface membrane sphingomyelin is hydrolyzed to phosphocholine and ceramide by membrane-associated neutral sphingomyelinase 2 (nSMase2), which is activated by oxidative stress and glutathione (GSH) depletion.
