# Supplementary material for: Impact of HepG2 Cells Glutathione Depletion on Neutral Sphingomyelinases mRNA Levels and Activity
Source: MDPI journal article supplement (doi:10.3390/cimb45060318), 2023-06-08
Supplement: s1 [file s1]

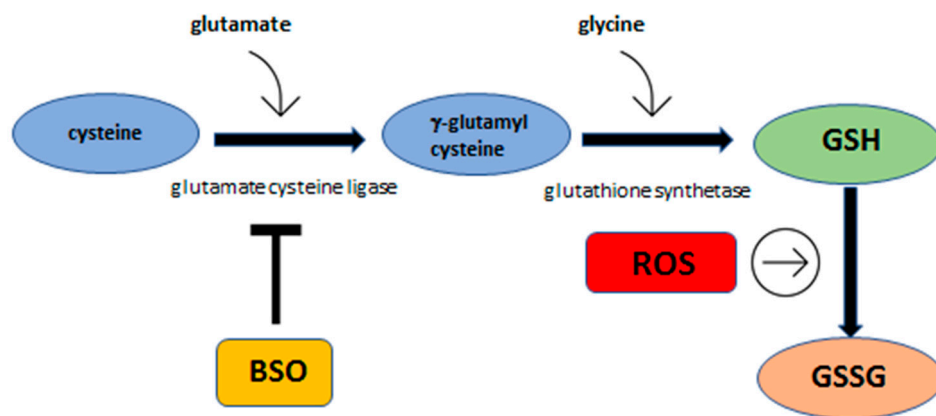

**Supplementary Figure S2.** Buthionine sulfoximine (BSO) inhibits the formation of glutathione (GSH) and thus reduces cellular antioxidant capacity.
